# Supplementary material for: Short-term molecular polarization of cells on symmetric and asymmetric micropatterns
Source: Royal Society of Chemistry journal article supplement (doi:10.1039/b922647h), 2010-01-01
Supplement: b922647h.pdf [file b922647h.pdf]

## **Supplementary Material Online**

### **Supplementary Movie 1**

Time-lapse of GFP-actin dynamics in live B16 cells on circular islands (2-hr time-point) imaged with digital fluorescence microscopy. Note asymmetric actin-rich accumulation at this time point. Time, min: sec.

### **Supplementary Movie 2**

Time-lapse of membrane ruffling dynamics in live B16 cells on circular islands (2-hr time-point) imaged with phase contrast microscopy. Note polarized formation and centripetal flow of membrane ruffles at this time point. Time, min: sec.

### **Supplementary Movie 3**

Another example of membrane ruffling dynamics in live B16 cells on circular islands (4-hr time-point). Note that initial membrane ruffles formation is asymmetric which gradually expands across the whole cell perimeter during this time window. Time, min: sec.
